# Supplementary material for: Distinct Changes Occur in the Human Breast Milk Microbiome Between Early and Established Lactation in Breastfeeding Guatemalan Mothers
Source: PubMed Central journal article supplement (PMC7907006; doi:10.3389/fmicb.2021.557180), 2021-02-12
Supplement: Data_Sheet_1.pdf [file Data_Sheet_1.pdf]

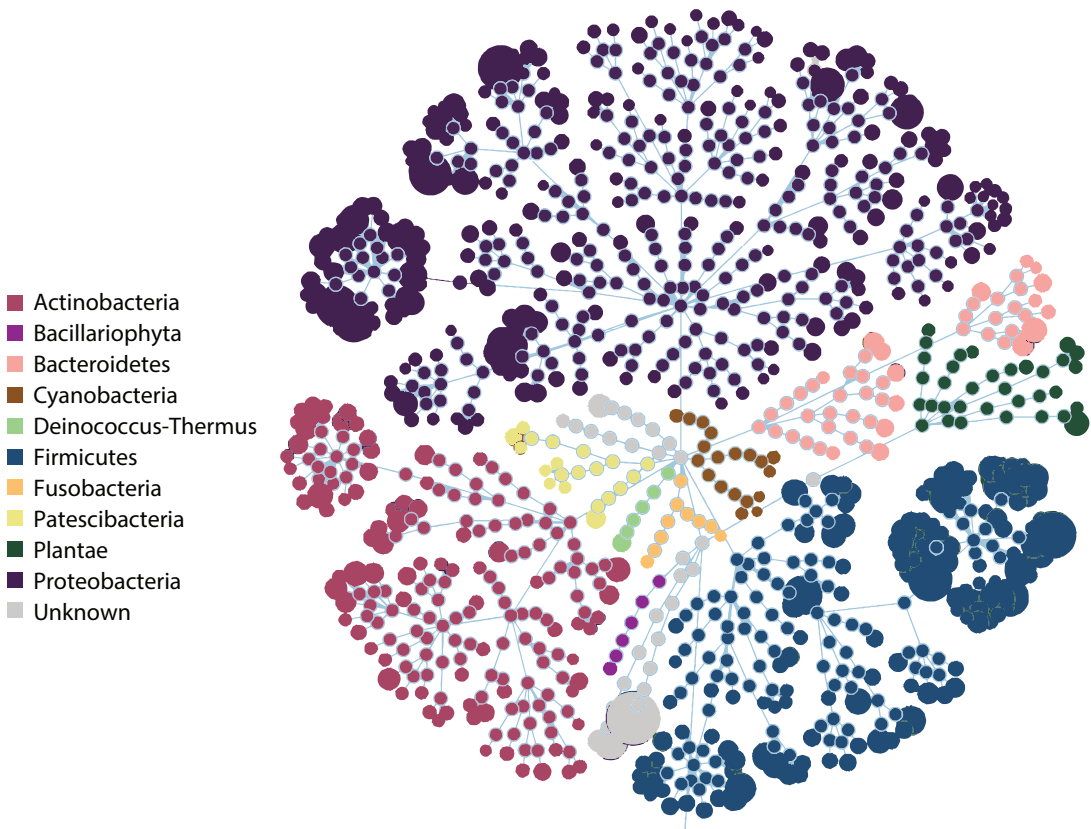

Supplementary figure 1 Total amplified community flower diagram illustrating raw count distribution across all OTUs.

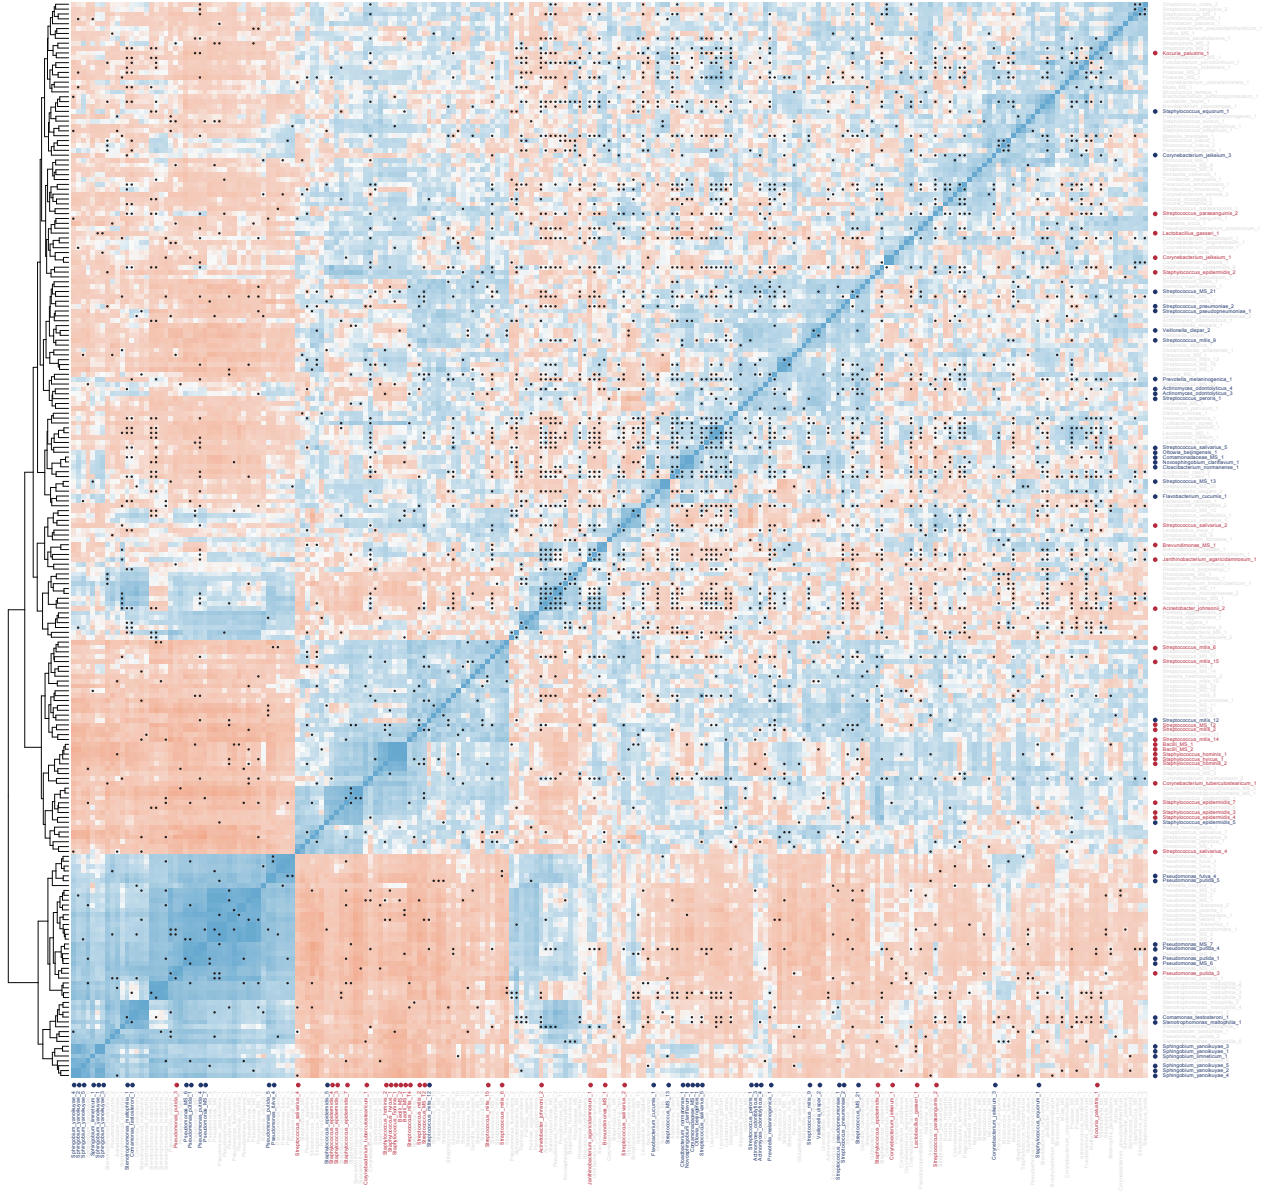

Supplementary figure 2

Count correlation of 200 OTUs including all mothers.

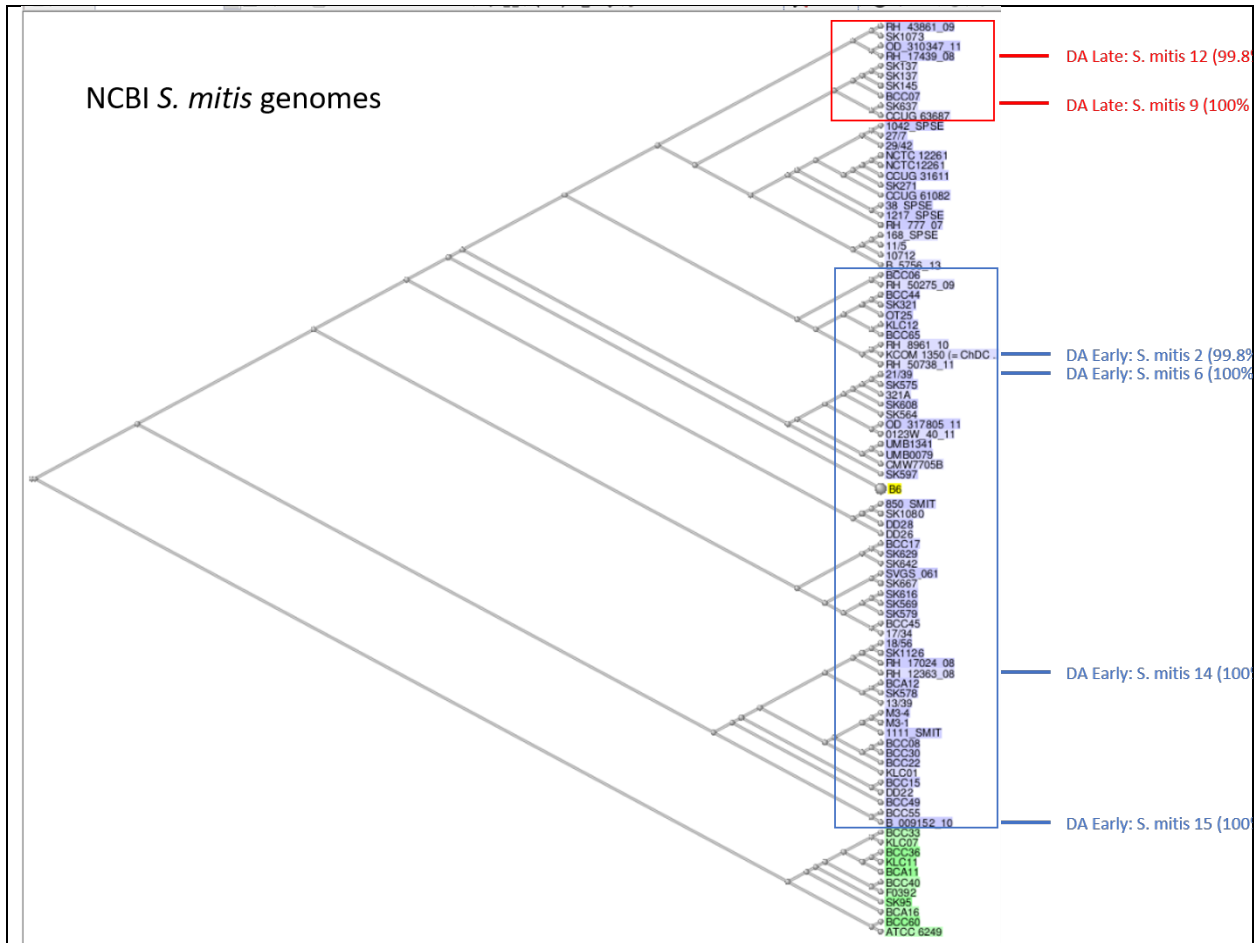

**Supplementary figure 3 *Streptococcus mitis* strain genome clustering**

*Streptococcus mitis* DA is strain cluster. Strain level research has been conducted (110) but this tree is based on all the up-to-date genomes submitted to NCBI.
